# Supplementary material for: Serendipitous Identification of Azine Anticancer Agents Using a Privileged Scaffold Morphing Strategy
Source: MDPI journal article supplement (doi:10.3390/molecules29071452), 2024-03-24

# Serendipitous Identification of Azine Anticancer Agents Using a Privileged Scaffold Morphing Strategy

Silvia Cesarini <sup>1,†</sup>, Ilaria Vicenti <sup>2,†</sup>, Federica Poggialini <sup>3,†</sup>, Silvia Filippi <sup>1,†</sup>, Eleonora Mancin <sup>1</sup>, Lia Fiaschi <sup>2</sup>, Elisa De Marchi <sup>1</sup>, Federica Giammarino <sup>2</sup>, Chiara Vagaggini <sup>3</sup>, Bruno Mattia Bizzarri, Raffaele Saladino <sup>1</sup>, Elena Dreassi <sup>3</sup>, Maurizio Zazzi <sup>2</sup>, Lorenzo Botta <sup>1,\*</sup>

<sup>1</sup> Department of Biological and Ecological Sciences, University of Viterbo, Via S.C. De Lellis s.n.c., 01100 Viterbo, Italy; [c.cesarinisilvia@gmail.com](mailto:c.cesarinisilvia@gmail.com) (S.C.); [silvia.filippi@unitus.it](mailto:silvia.filippi@unitus.it) (S.F.); [eleonora.mancin98@gmail.com](mailto:eleonora.mancin98@gmail.com) (E.M.); [elisa.demarchi@unitus.it](mailto:elisa.demarchi@unitus.it) (E.D.M.); [bm.bizzarri@unitus.it](mailto:bm.bizzarri@unitus.it) (B.M.B.); [saladino@unitus.it](mailto:saladino@unitus.it) (R.S.)

<sup>2</sup> Department of Medical Biotechnologies, University of Siena, 53100 Siena, Italy; ; [ilariavicenti@gmail.com](mailto:ilariavicenti@gmail.com) (I.V.); [lia.fiaschi@unisi.it](mailto:lia.fiaschi@unisi.it) (L.F.); [federica.giammari@gmail.com](mailto:federica.giammari@gmail.com) (F.G.); [maurizio.zazzi@gmail.com](mailto:maurizio.zazzi@gmail.com) (M.Z.)

<sup>3</sup> Department of Biotechnology, Chemistry, and Pharmacy (DBCF), University of Siena, 53100 Siena, Italy; [poggialini5@student.unisi.it](mailto:poggialini5@student.unisi.it) (F.P.); [chiara.vagaggini@student.unisi.it](mailto:chiara.vagaggini@student.unisi.it) (C.V.); [elena.dreassi@unisi.it](mailto:elena.dreassi@unisi.it) (E.D.)

\* Correspondence: [lorenzo.botta@unitus.it](mailto:lorenzo.botta@unitus.it);

† These authors contributed equally to this work.

*S1: Nuclear Overhauser Effect Spectroscopy (NOESY) of pyrimidine intermediates 11 and 12.*

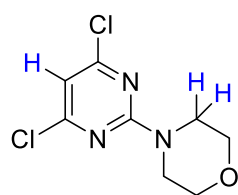

11

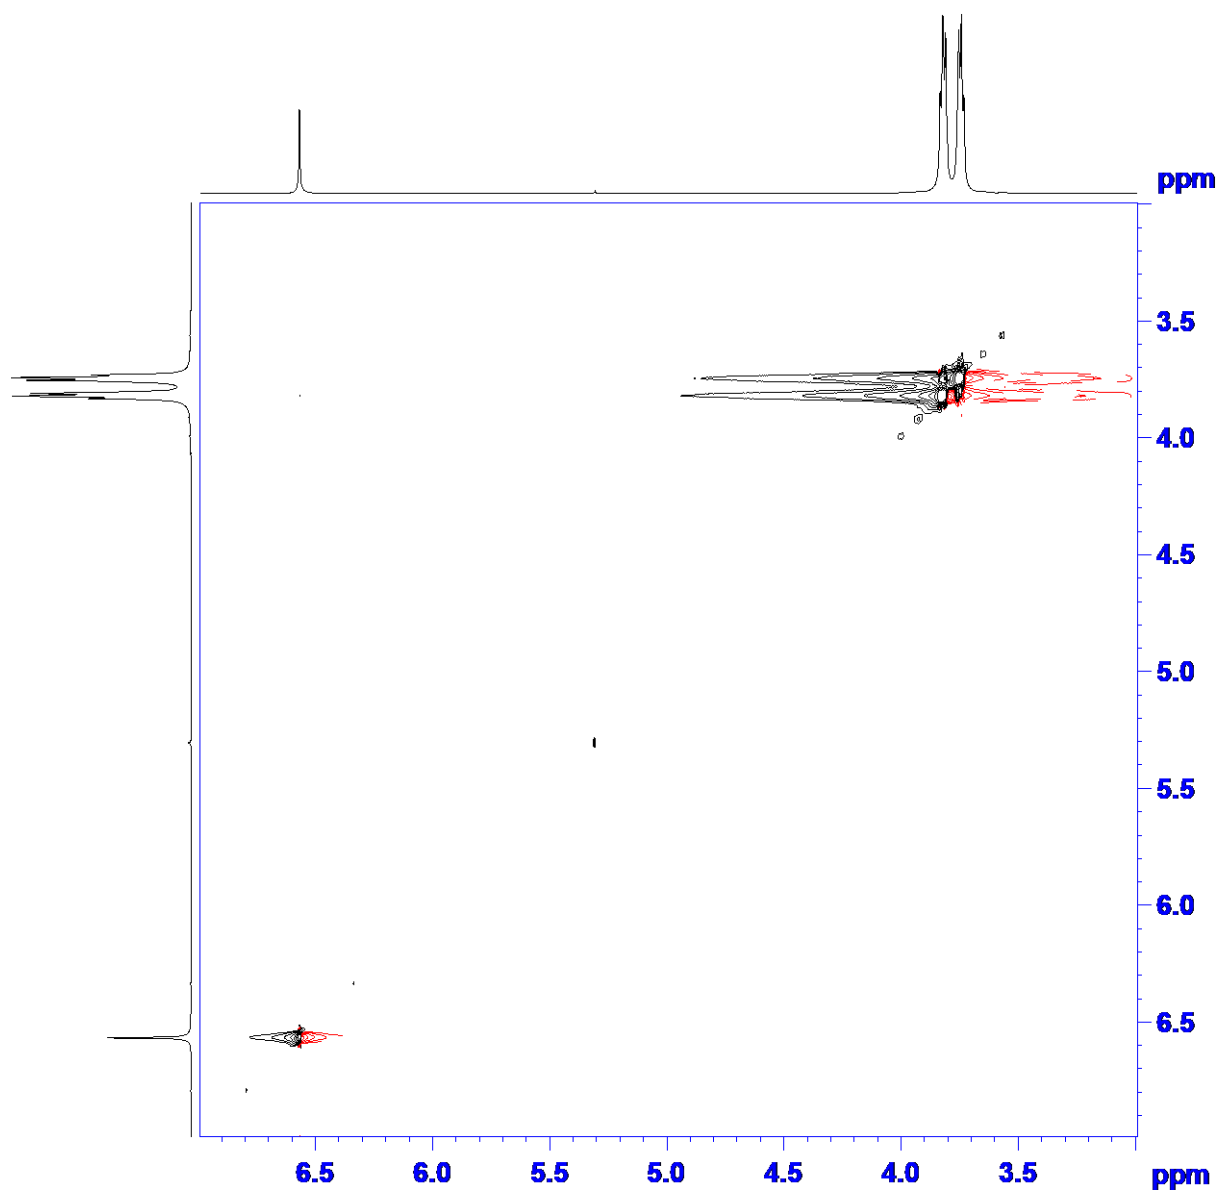

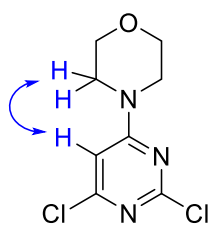

12

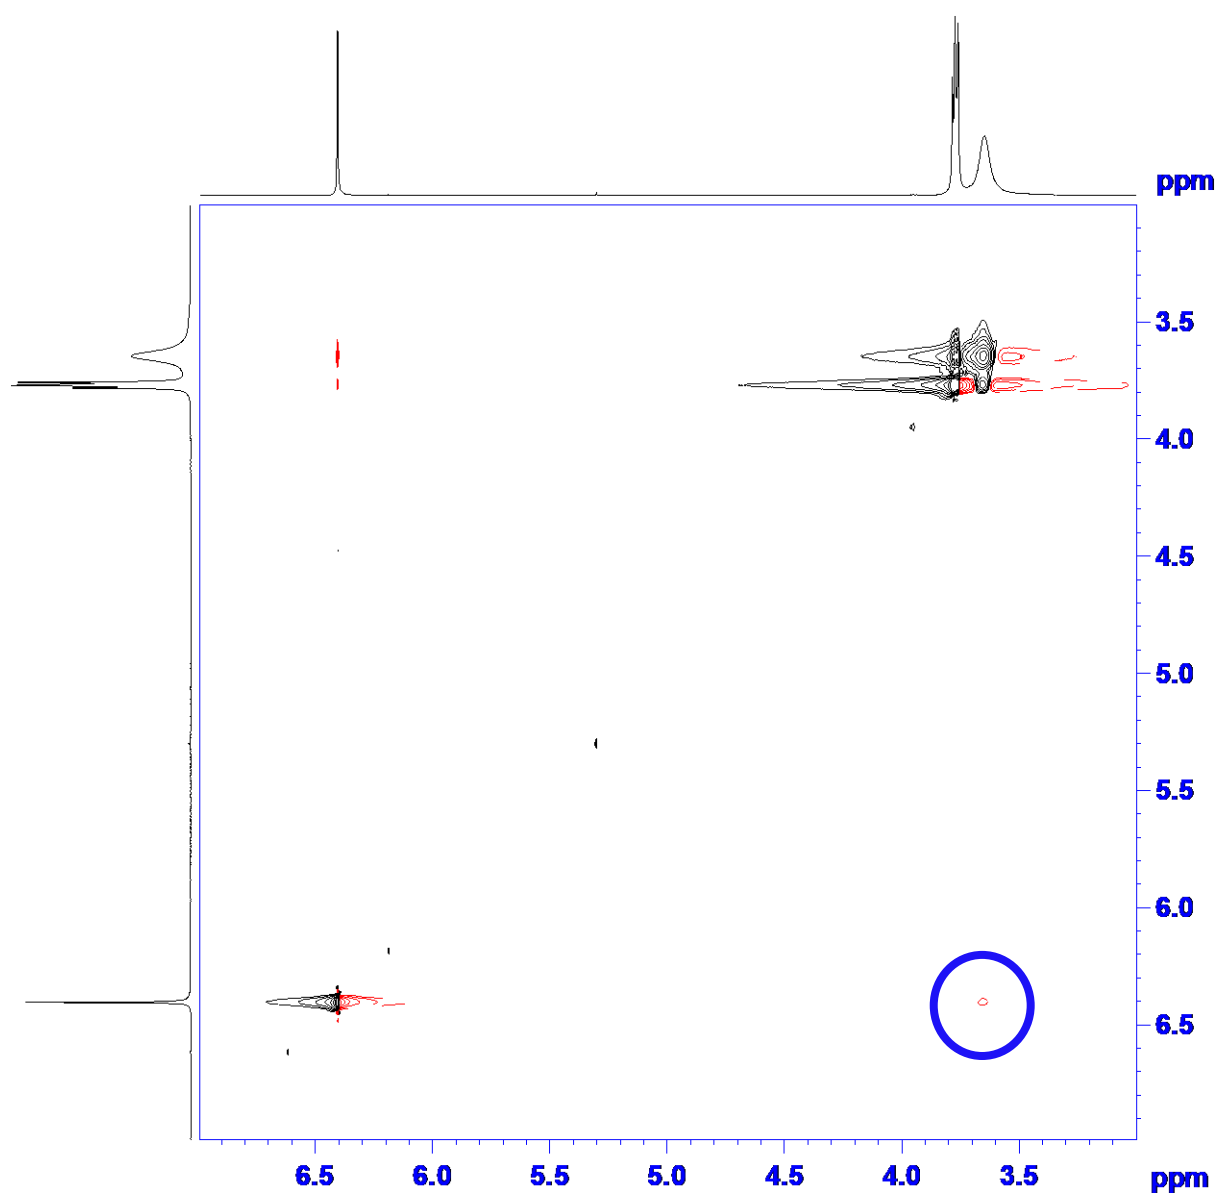

**S2:  $^1\text{H}$  NMR of pyridine intermediates 23 and 24.**

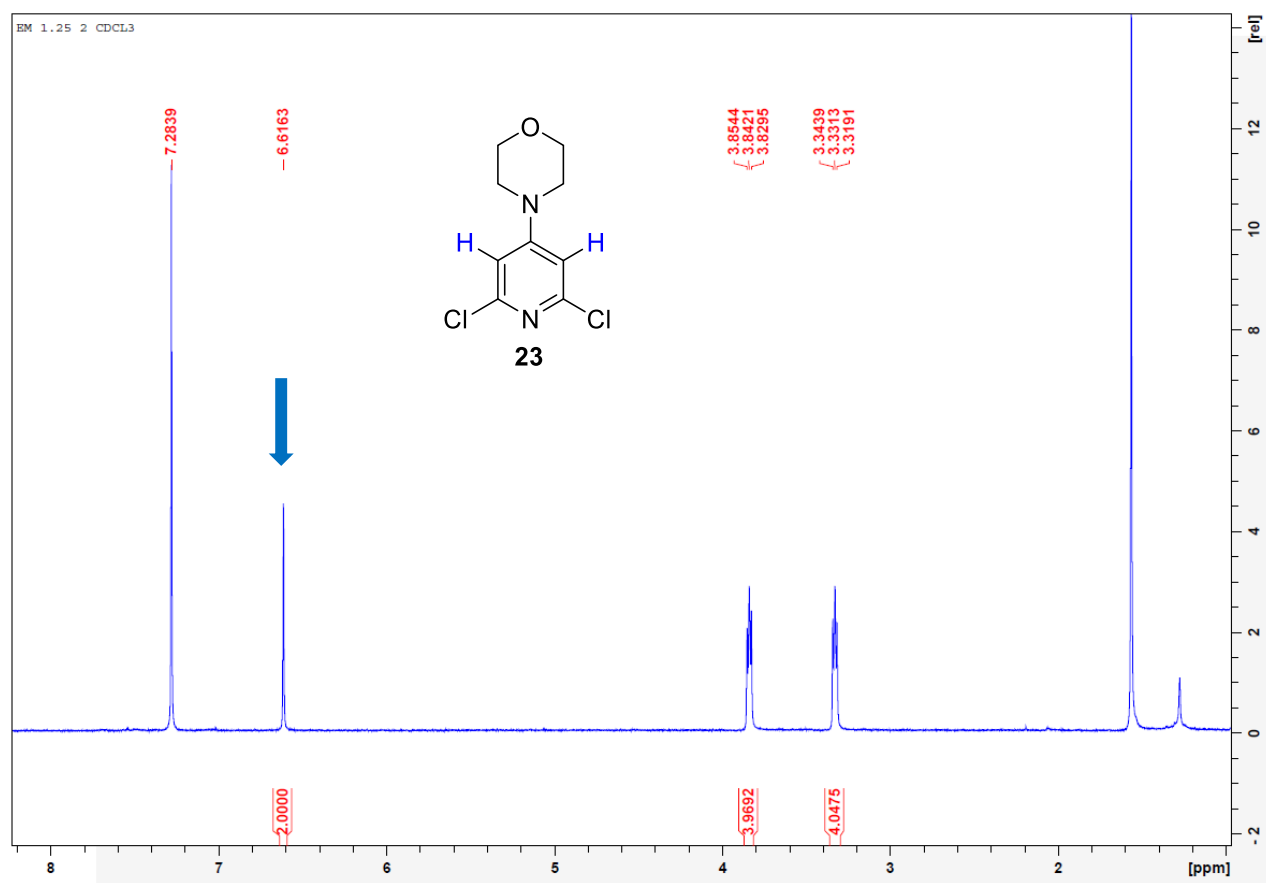

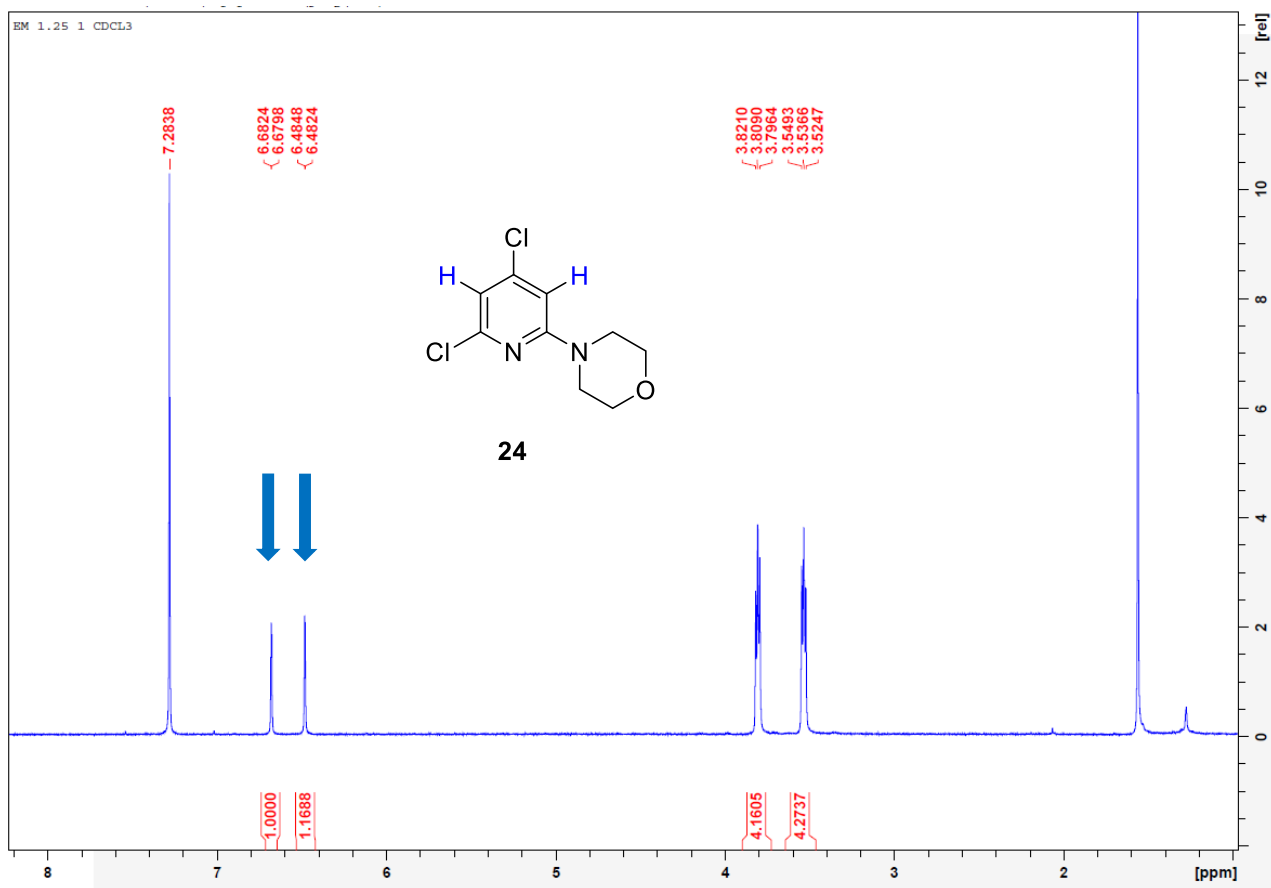

**S3: NMR spectra for highly decorated pyrimidines and pyridine derivatives**  
**Pyrimidine 14a**

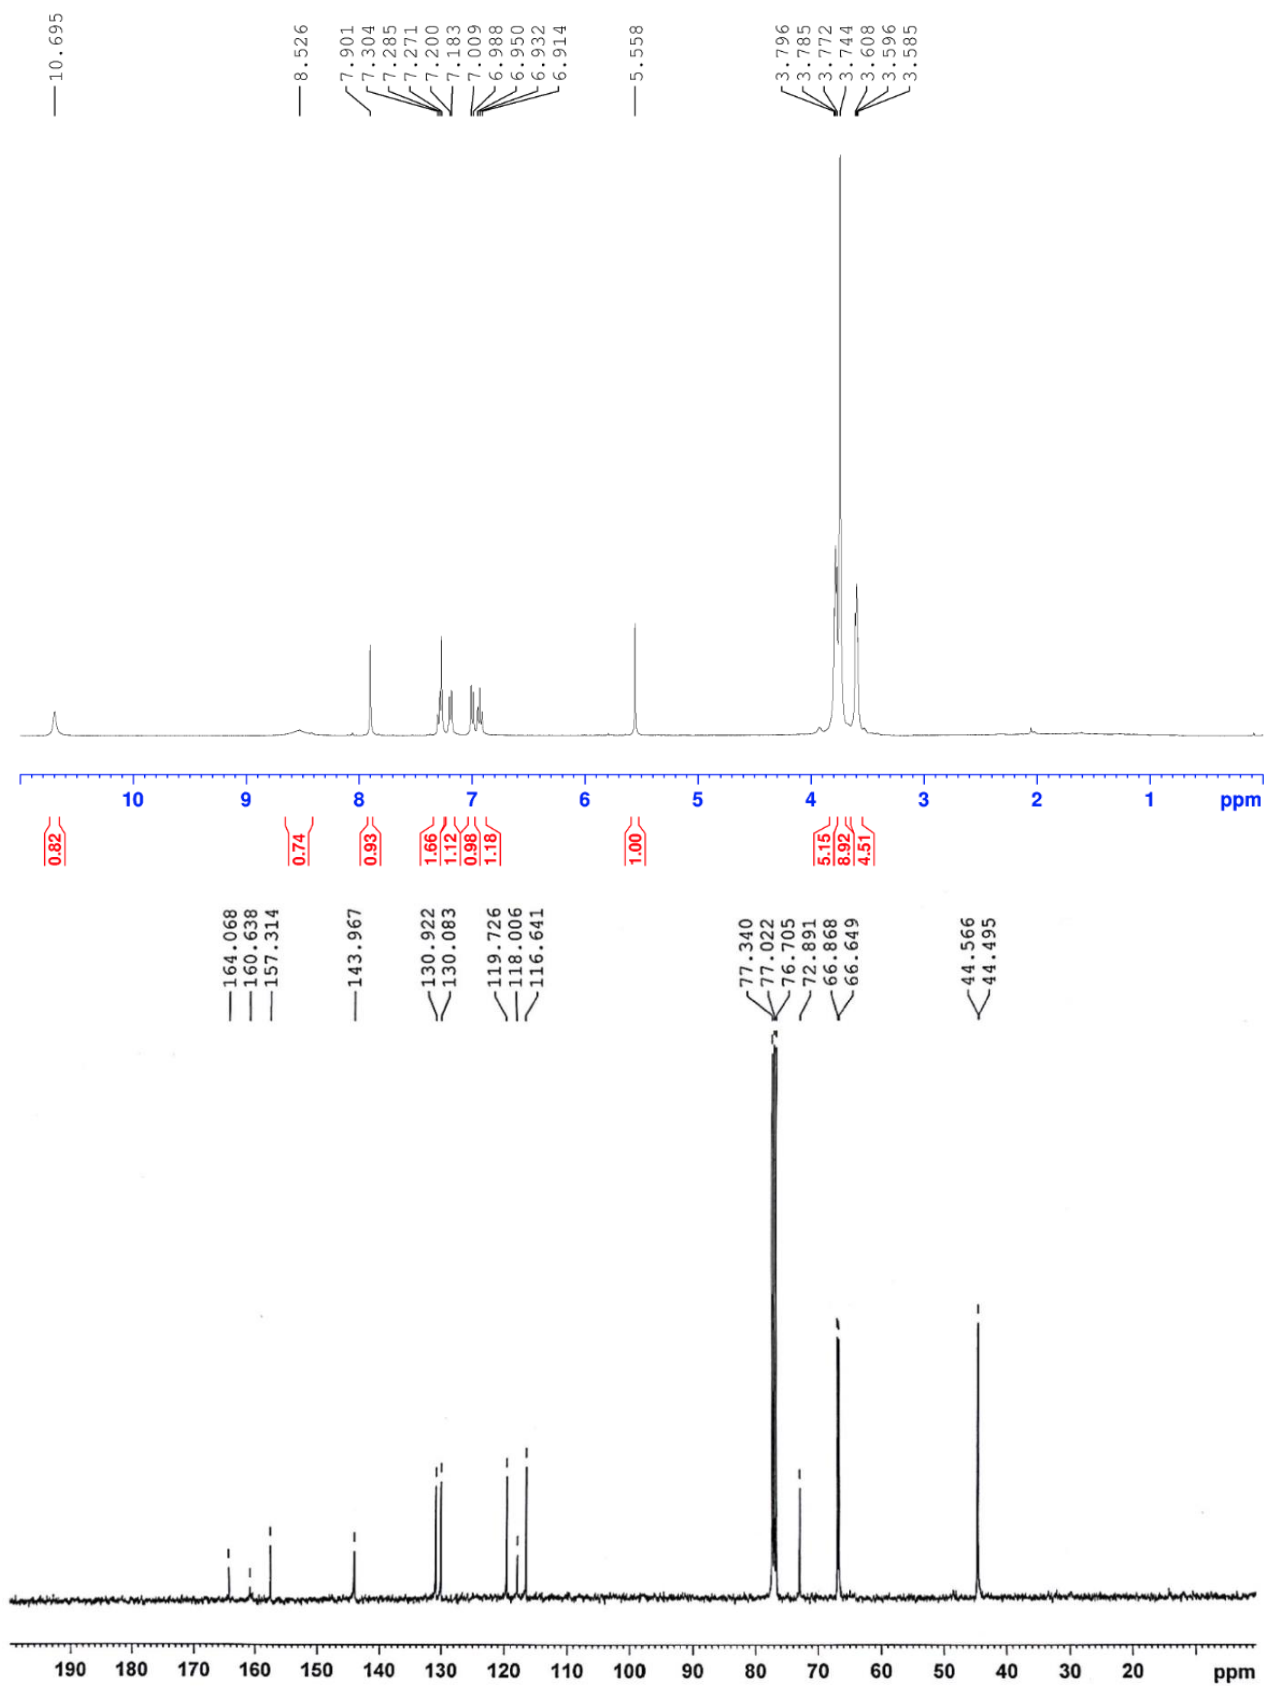

**Pyrimidine 14b**

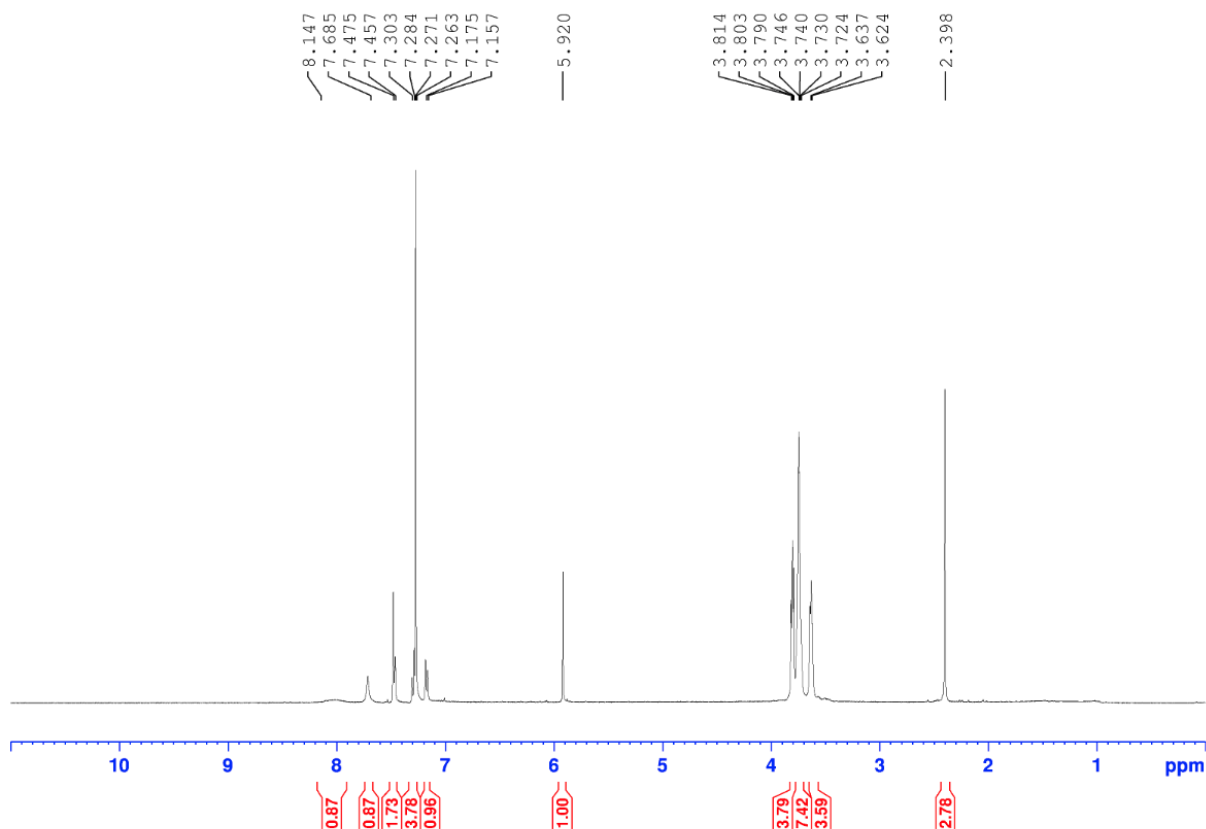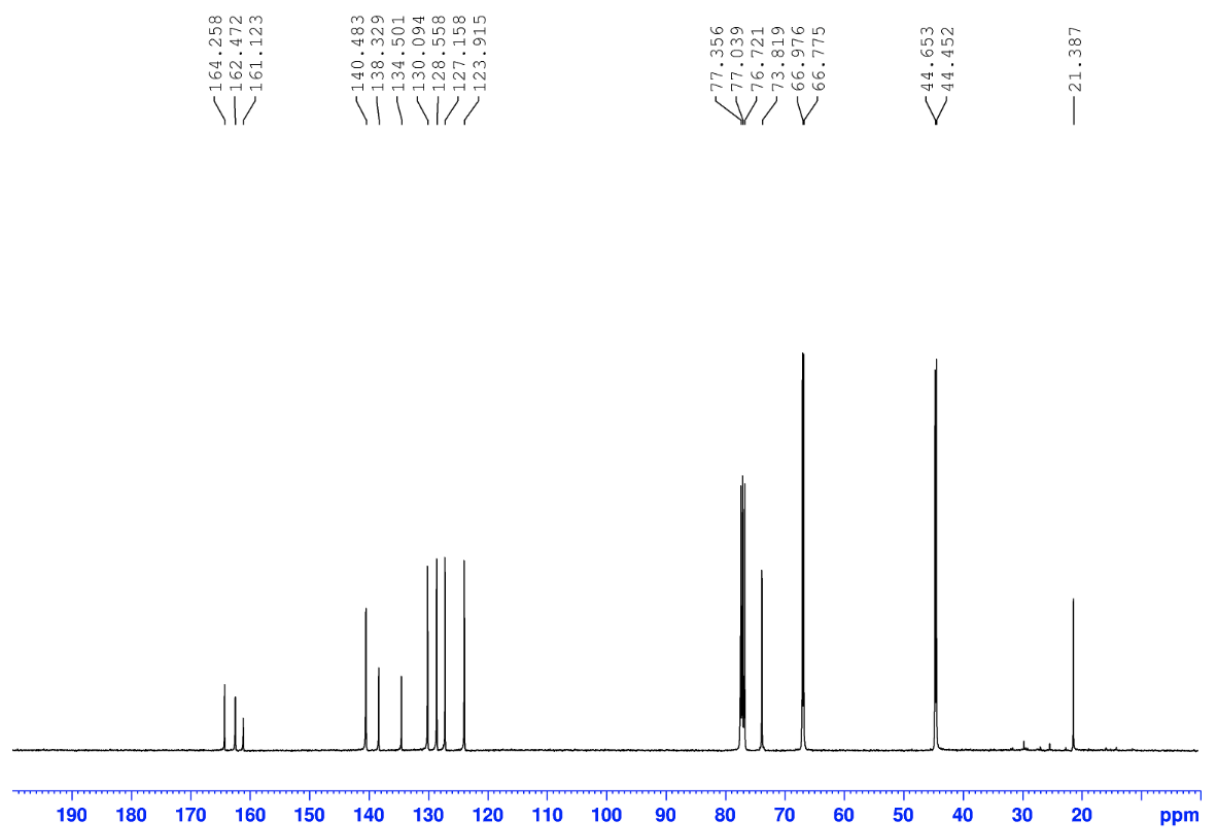

**Pyrimidine 19a**

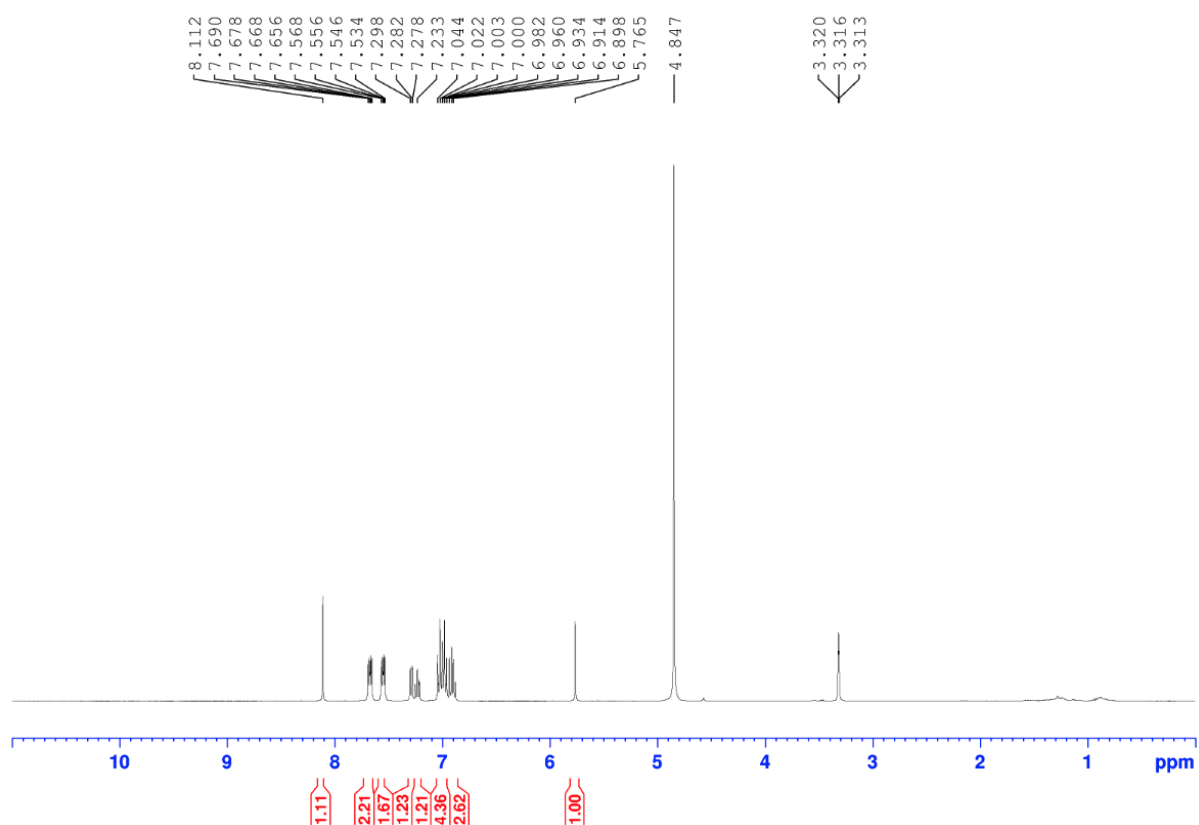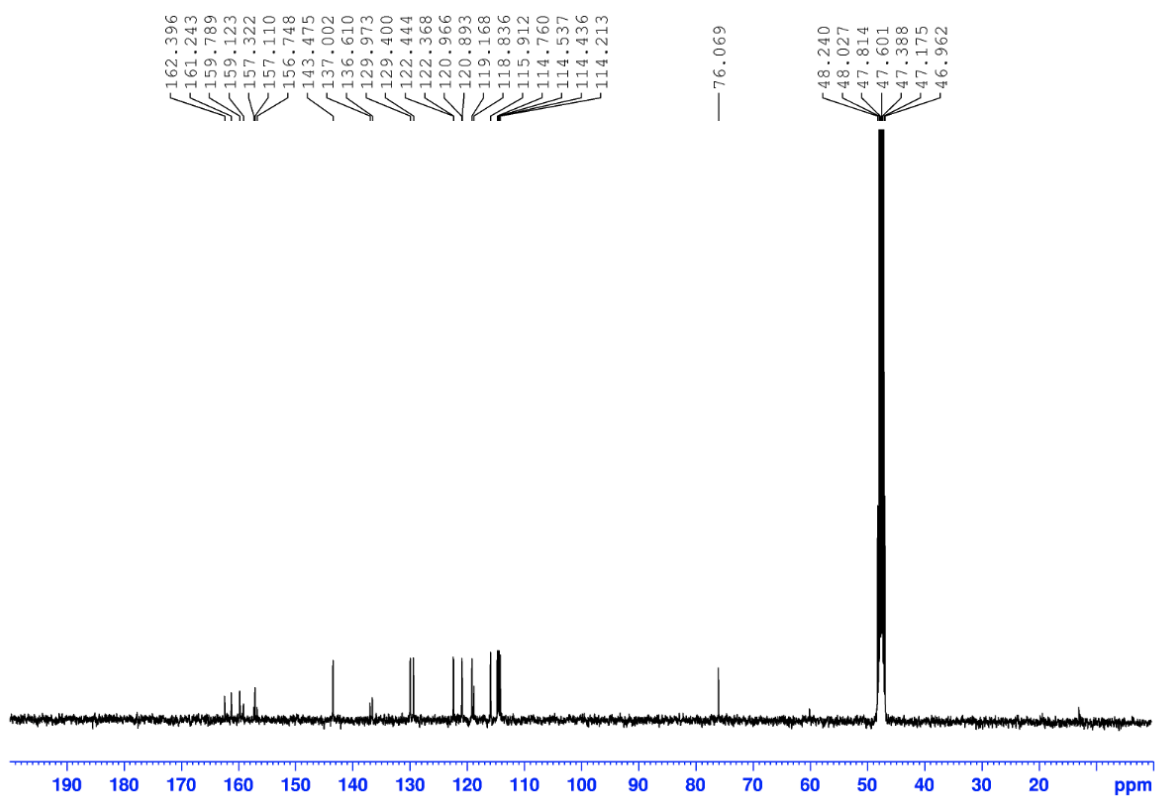



**Pyrimidine 19b**

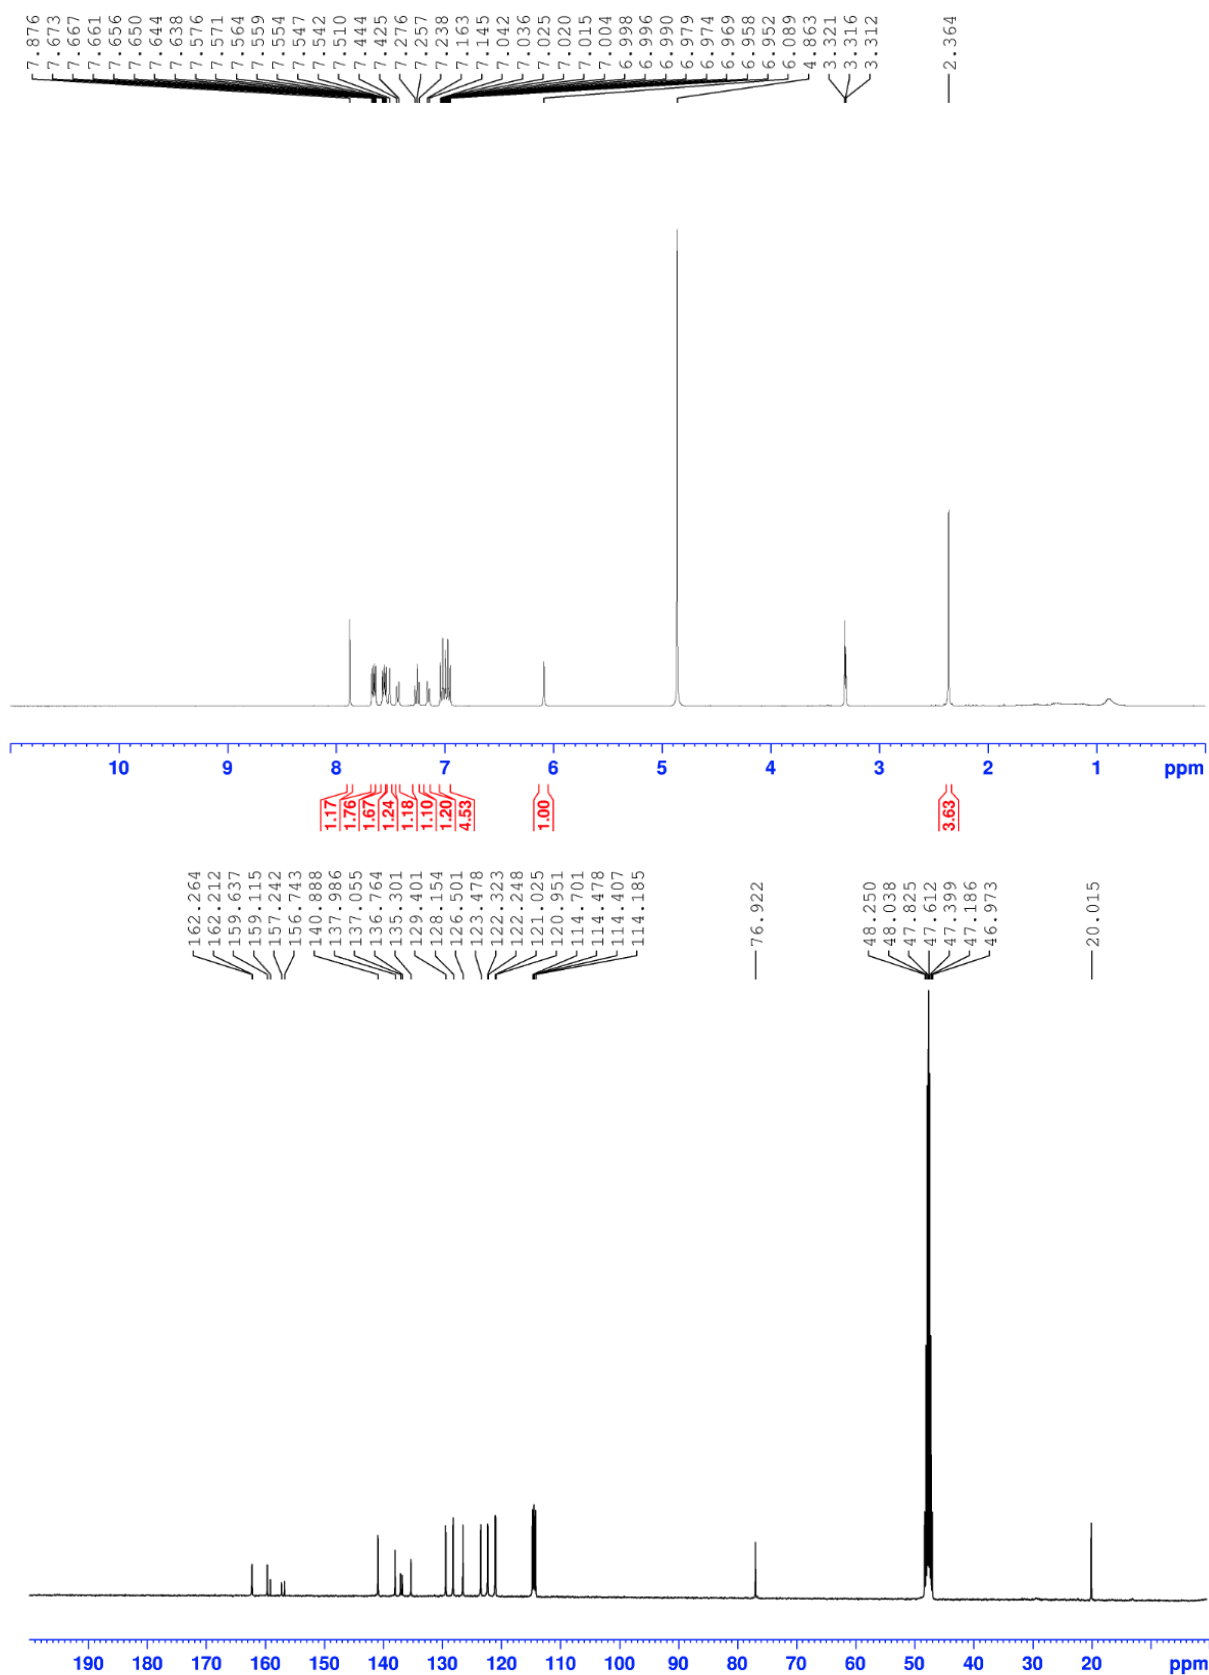

**Pyrimidine 21a**

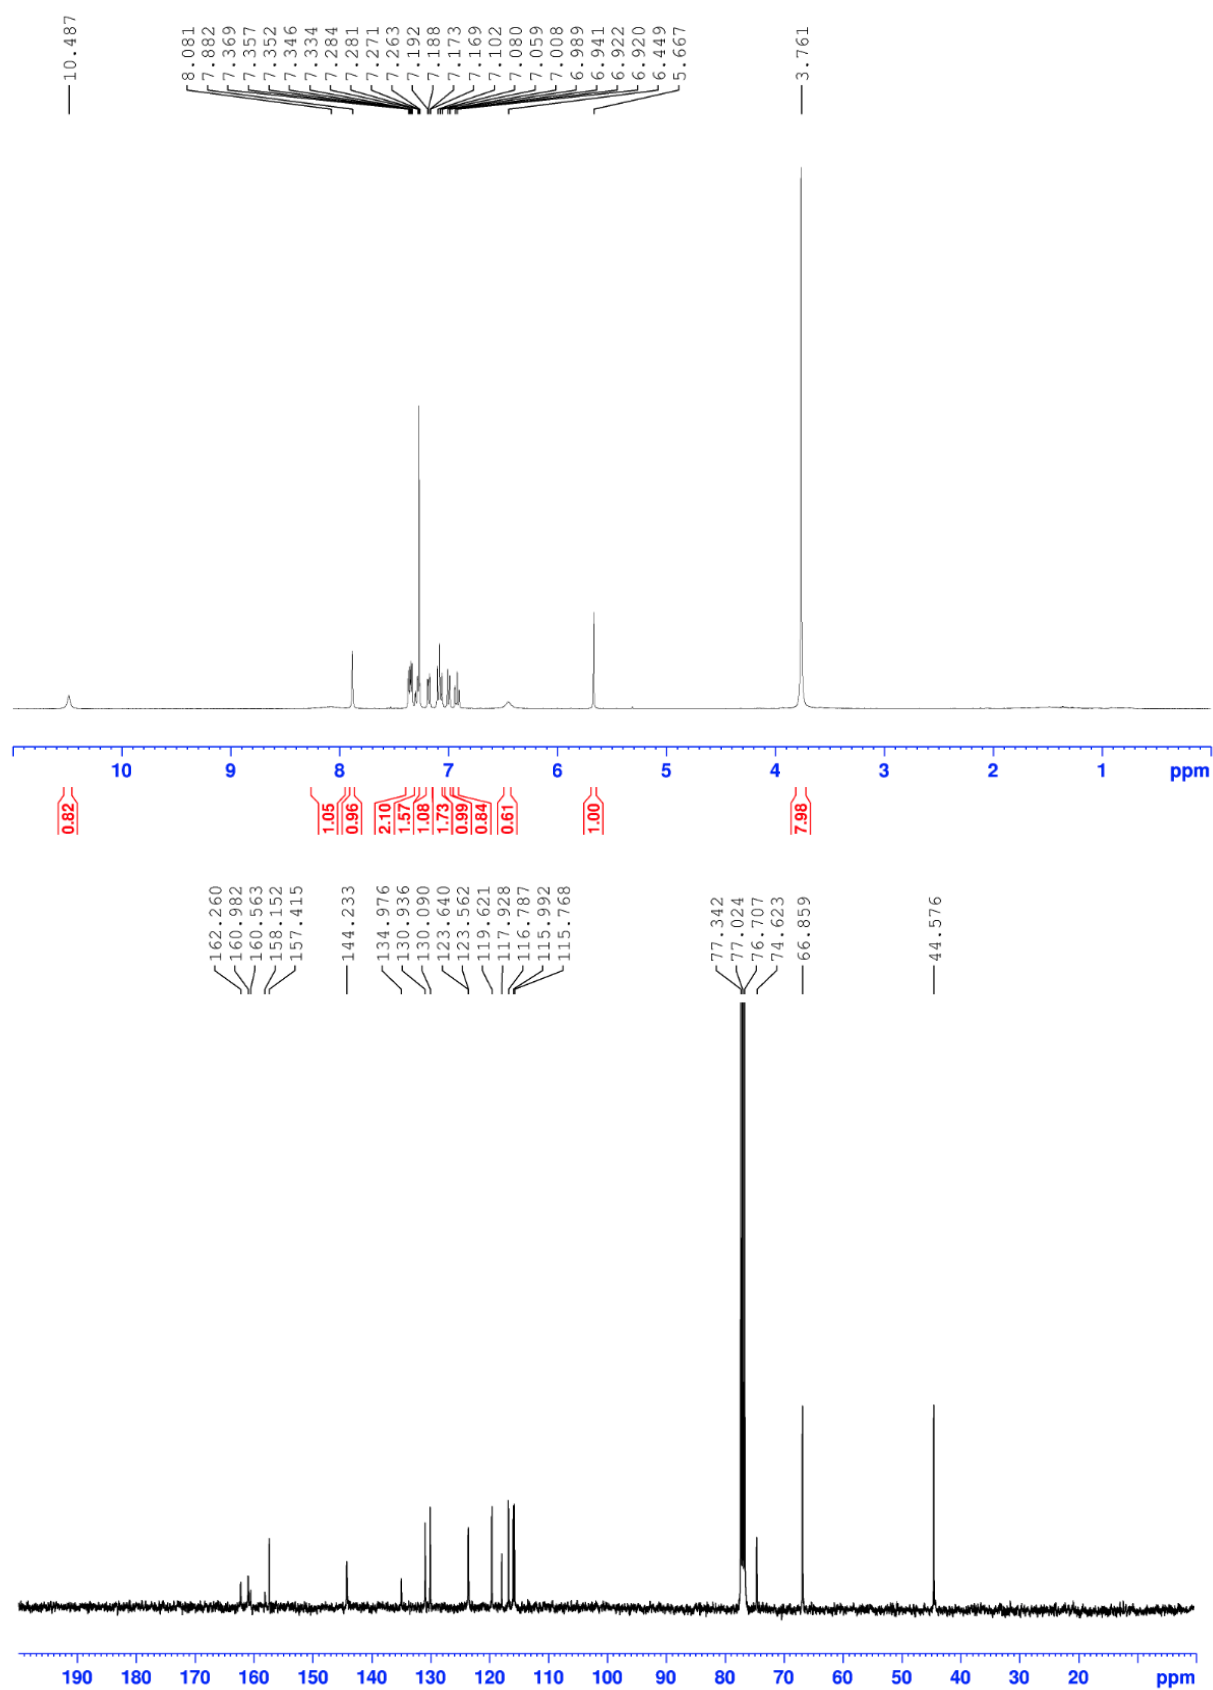

**Pyrimidine 21b**

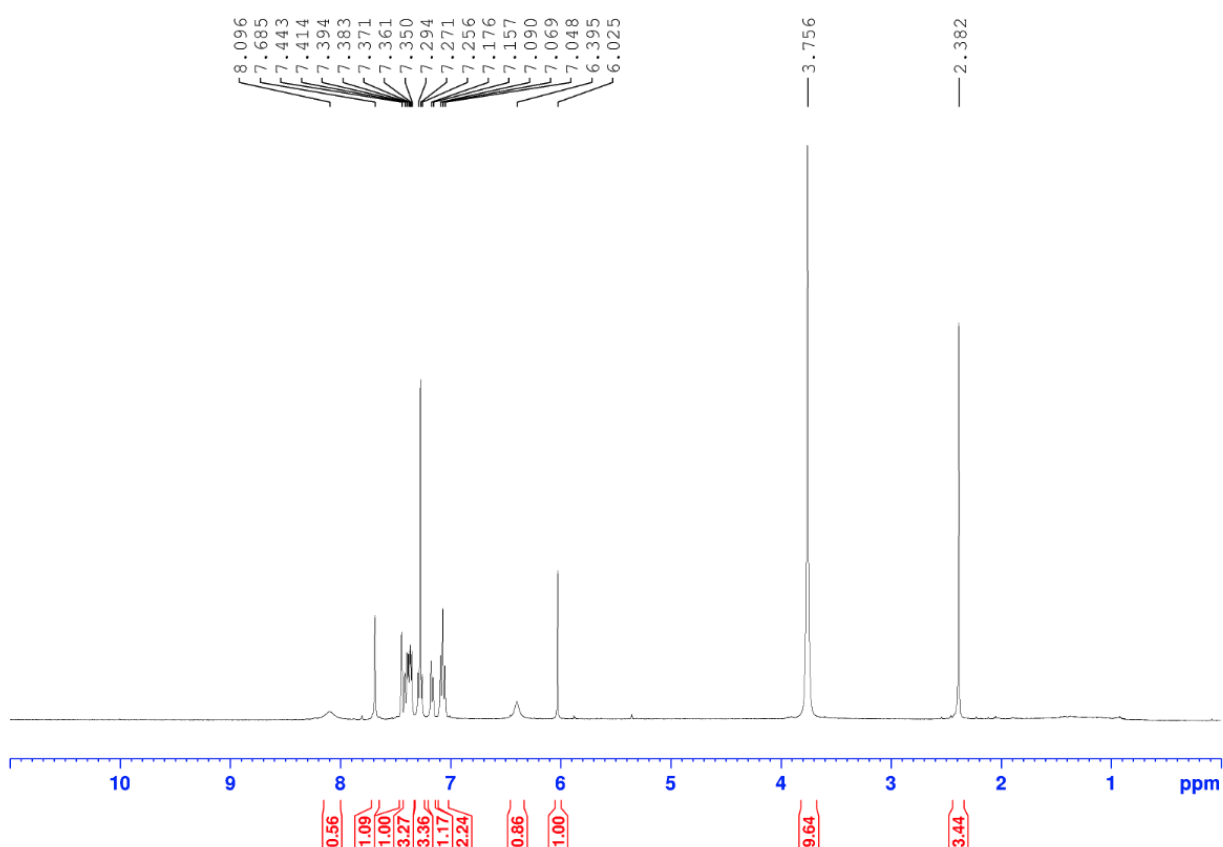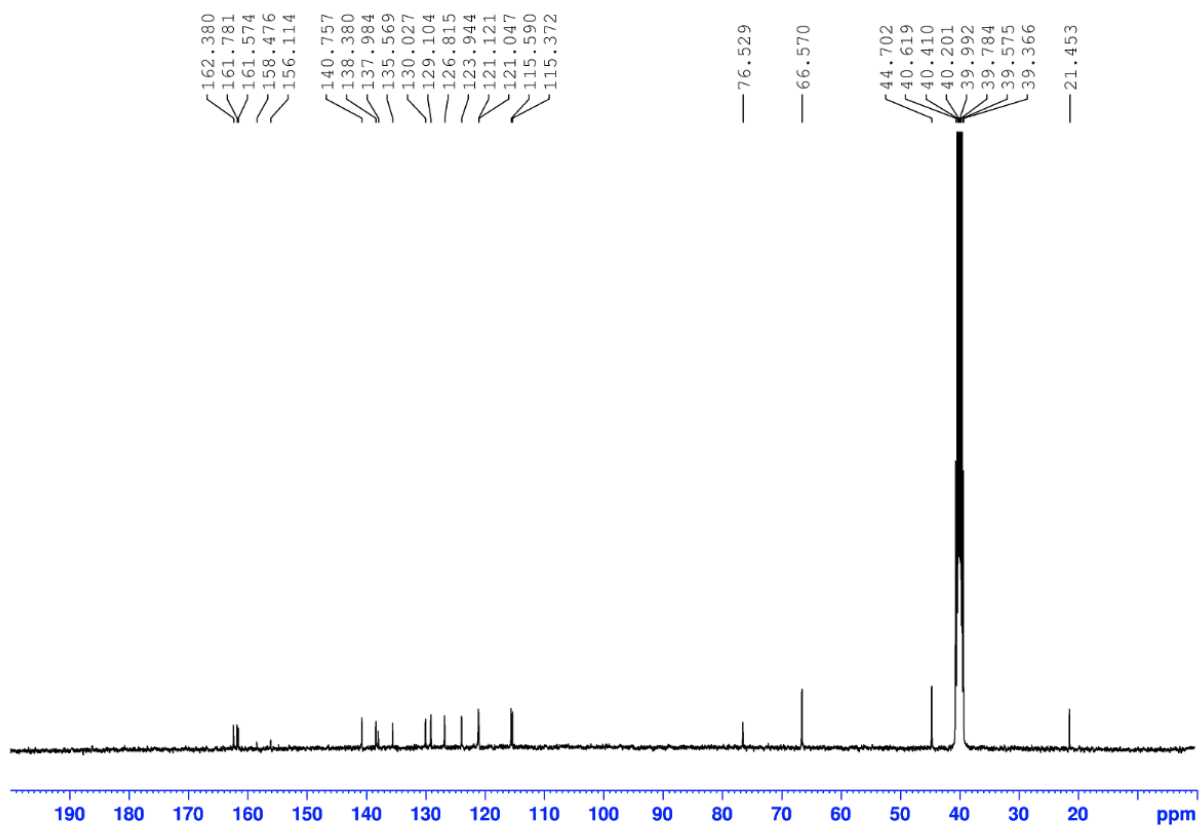

# Pyridine 27a

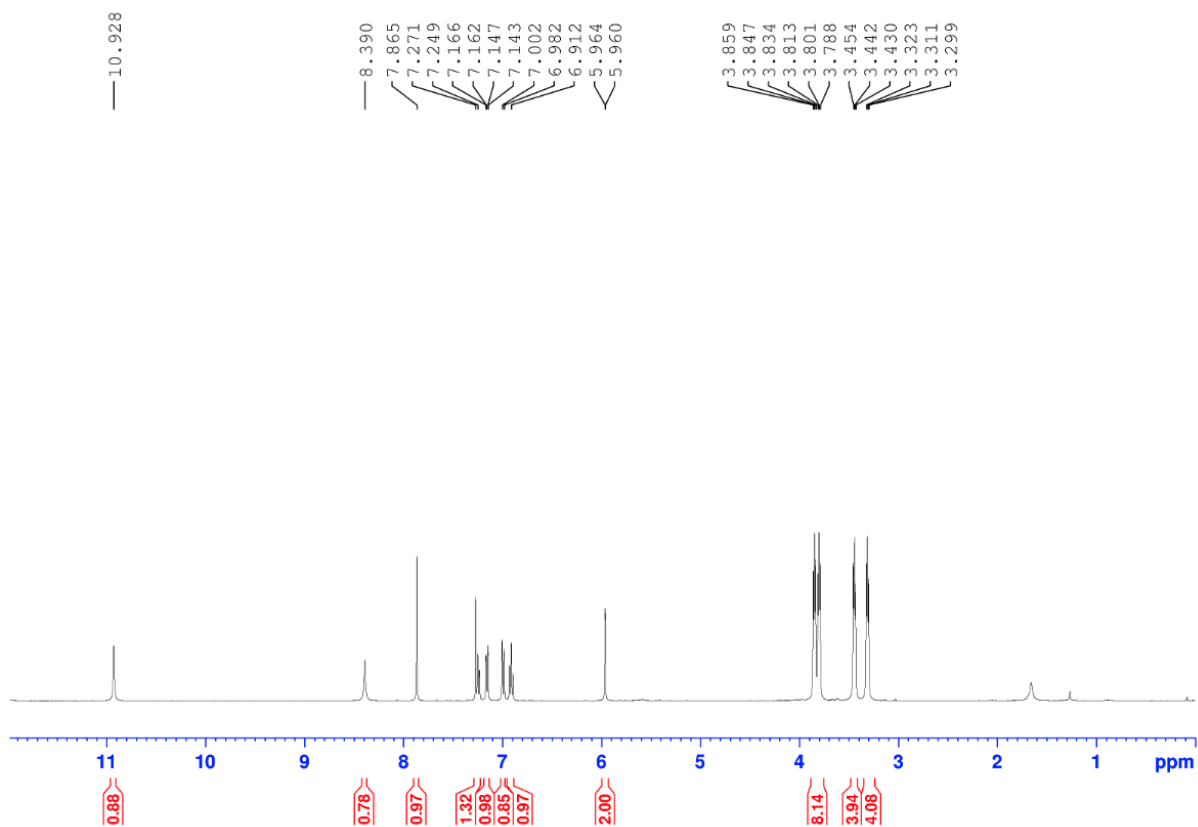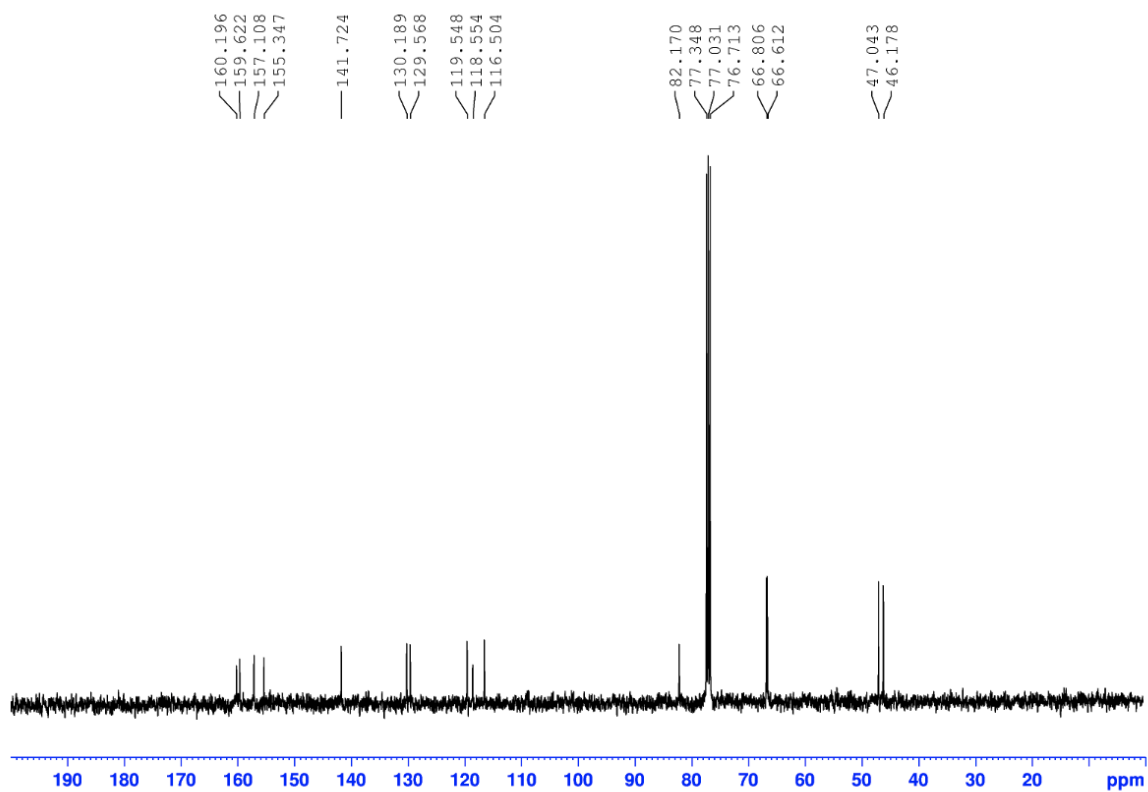

**Pyridine 27b**

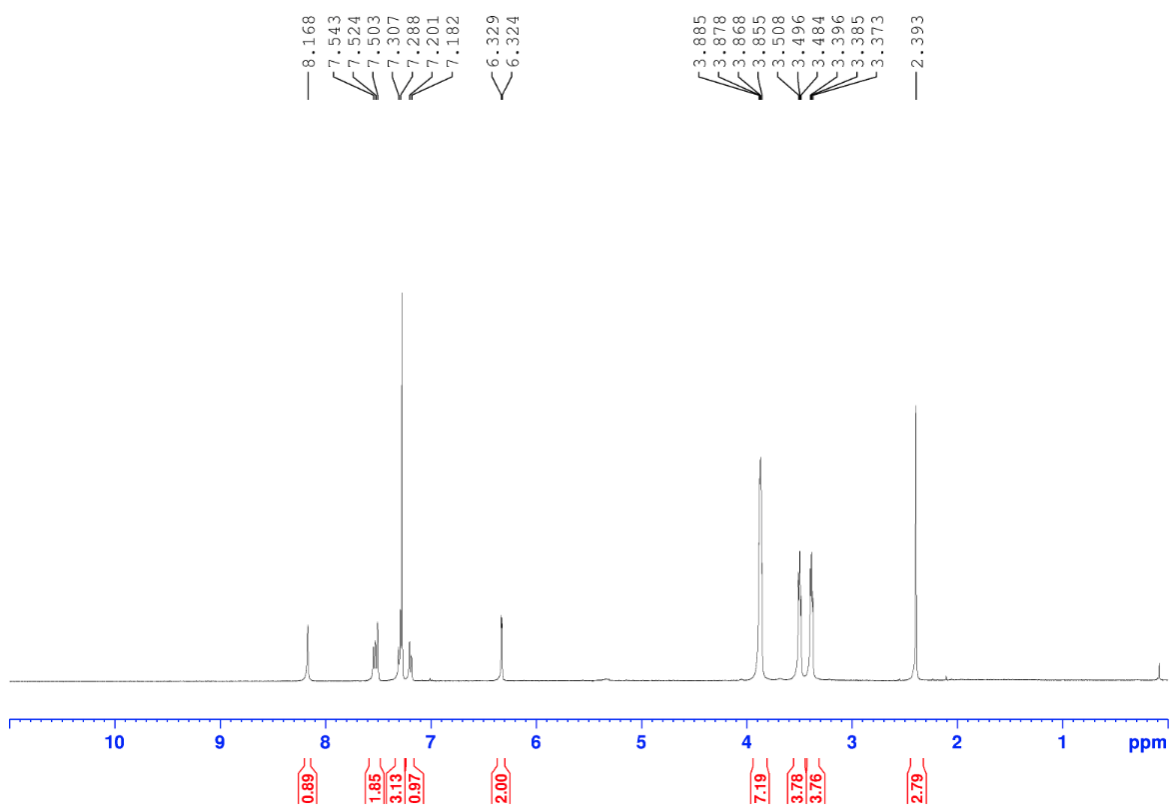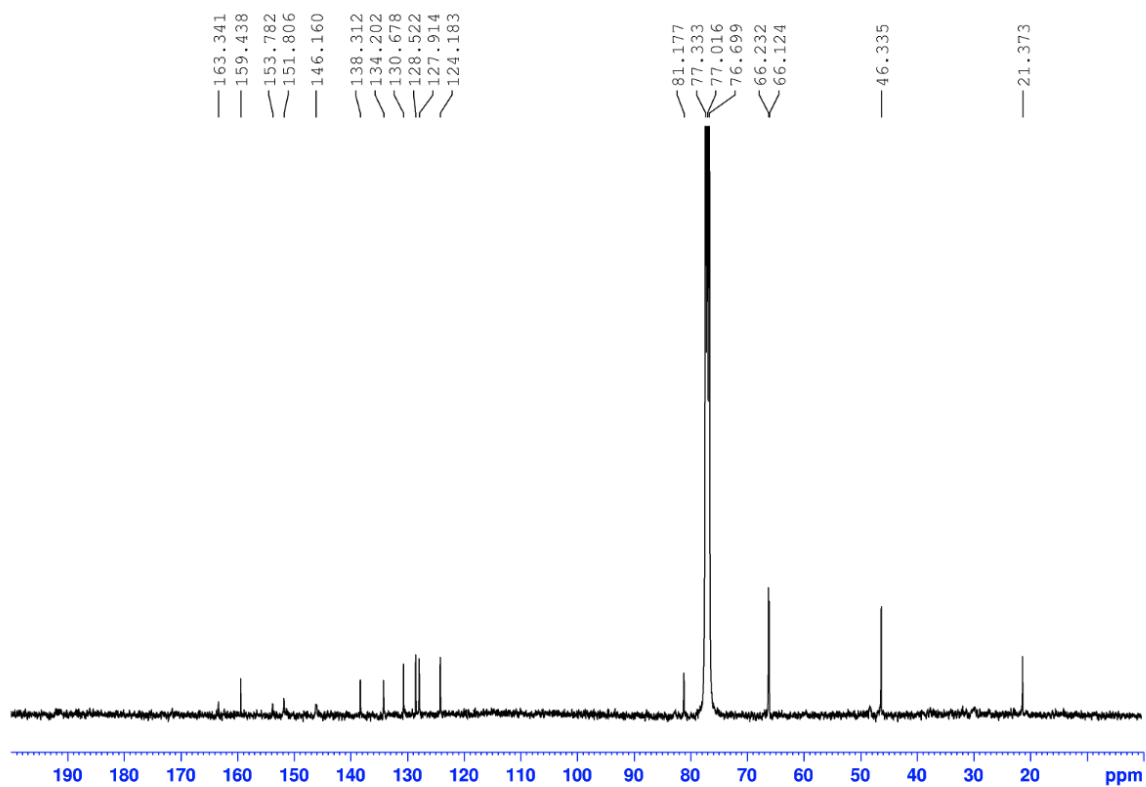

**Pyridine 33a**

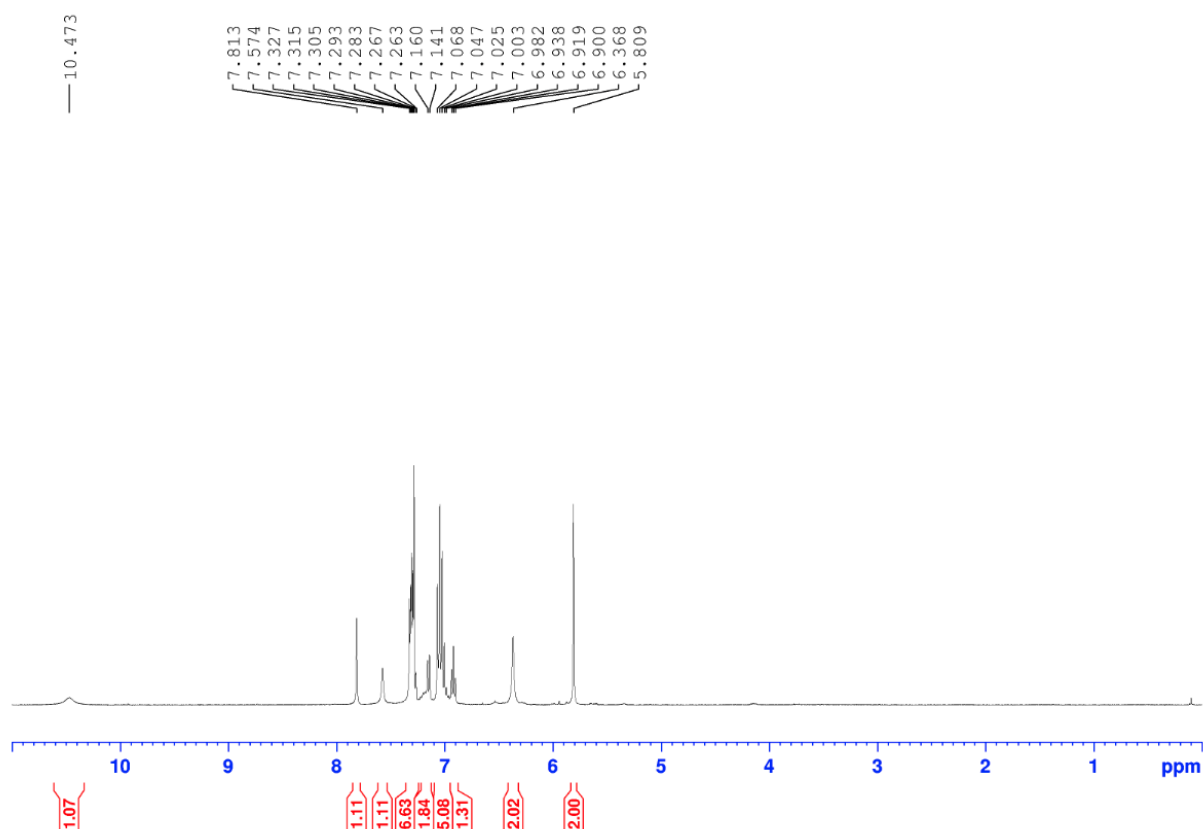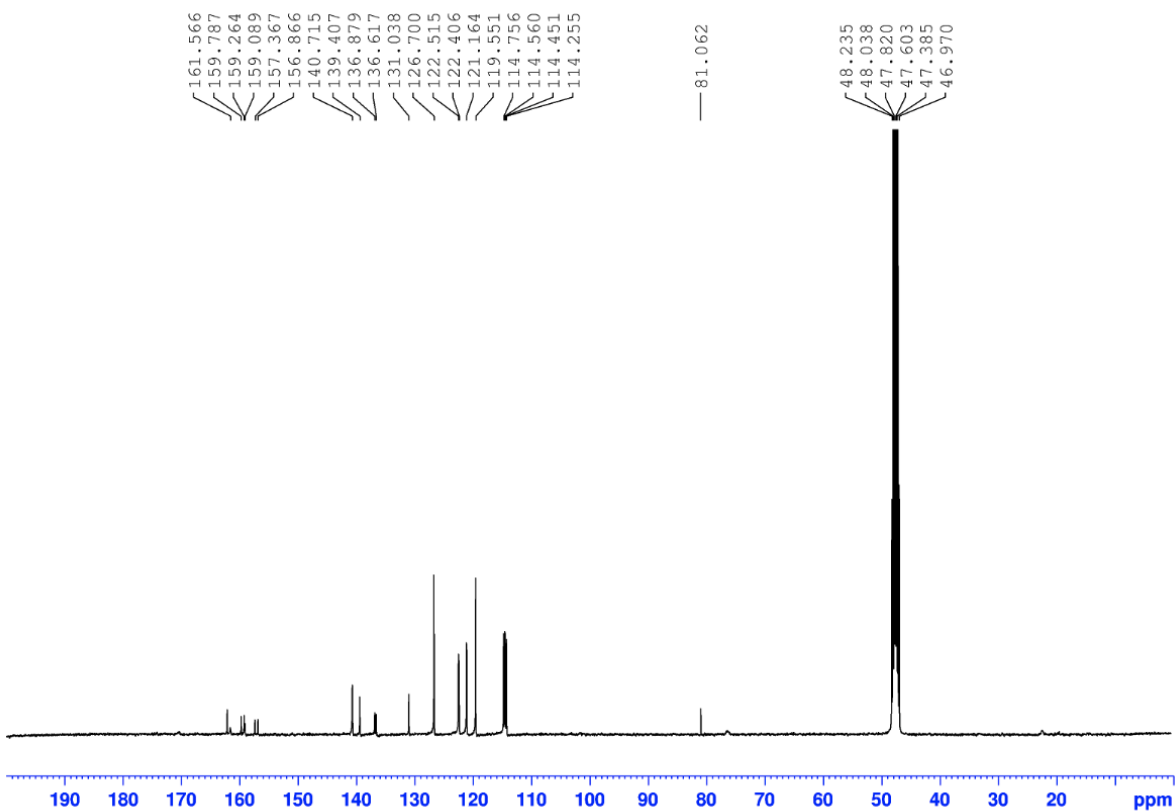

**Pyridine 33b**

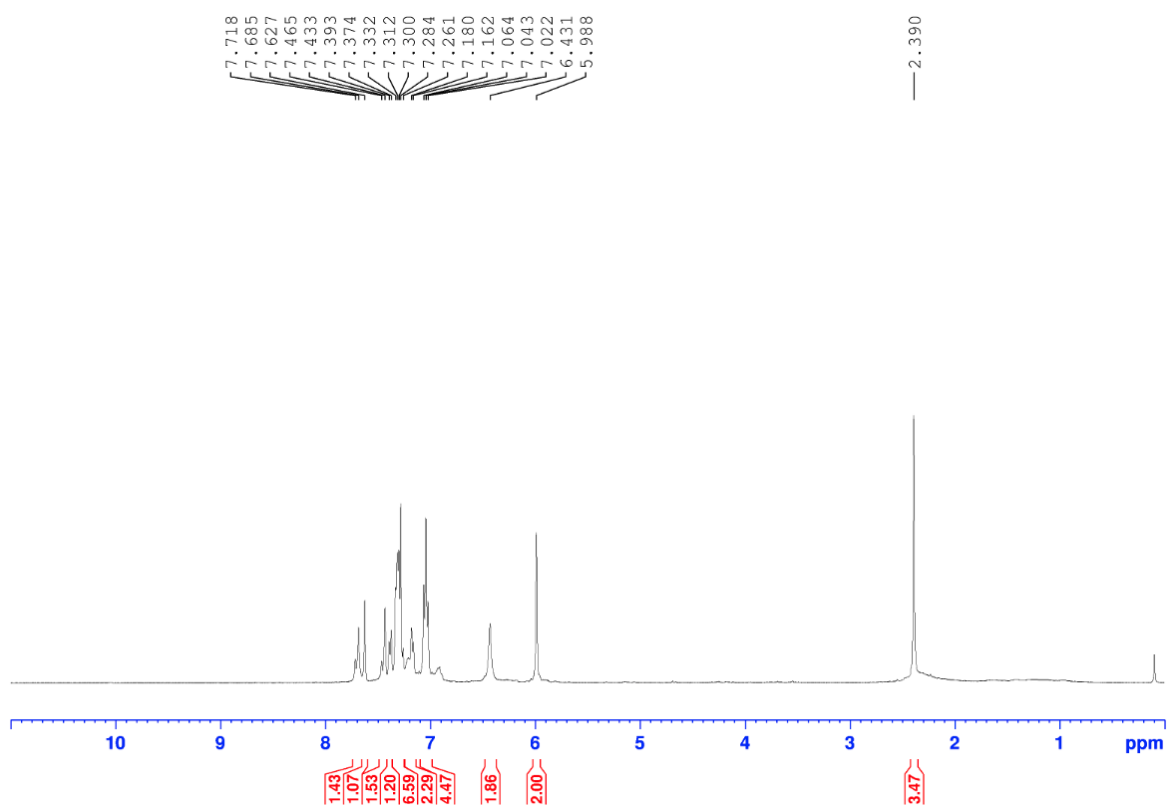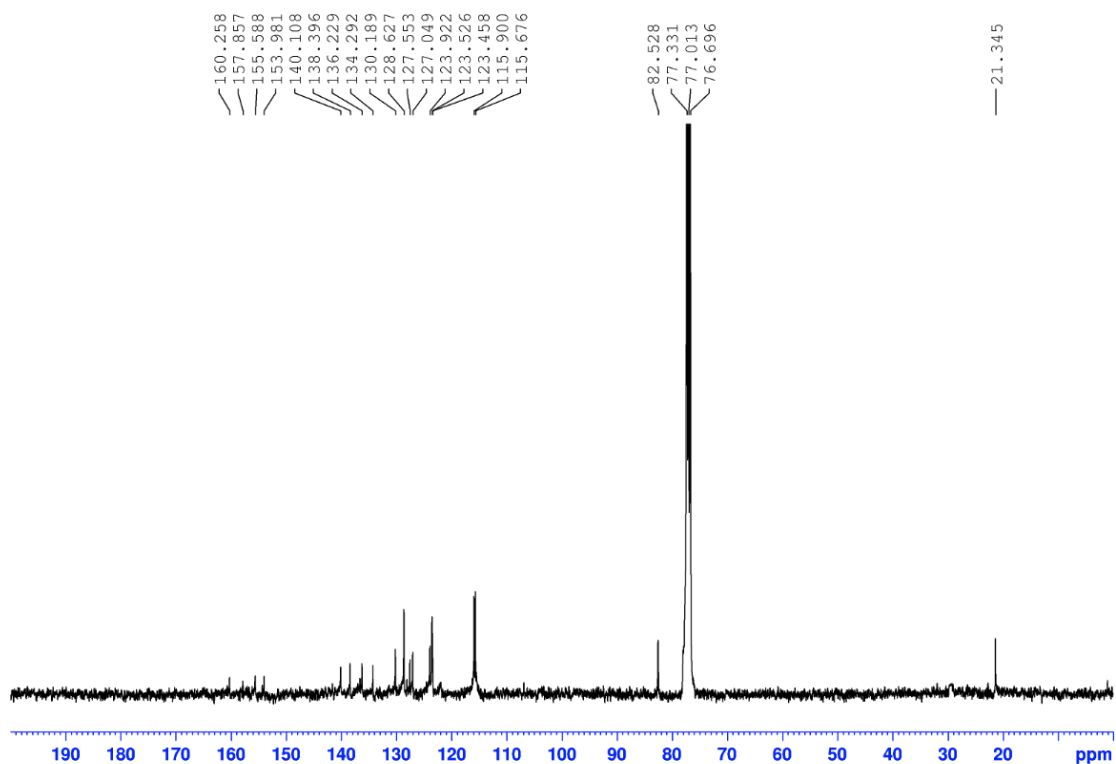

**Pyridine 38a**

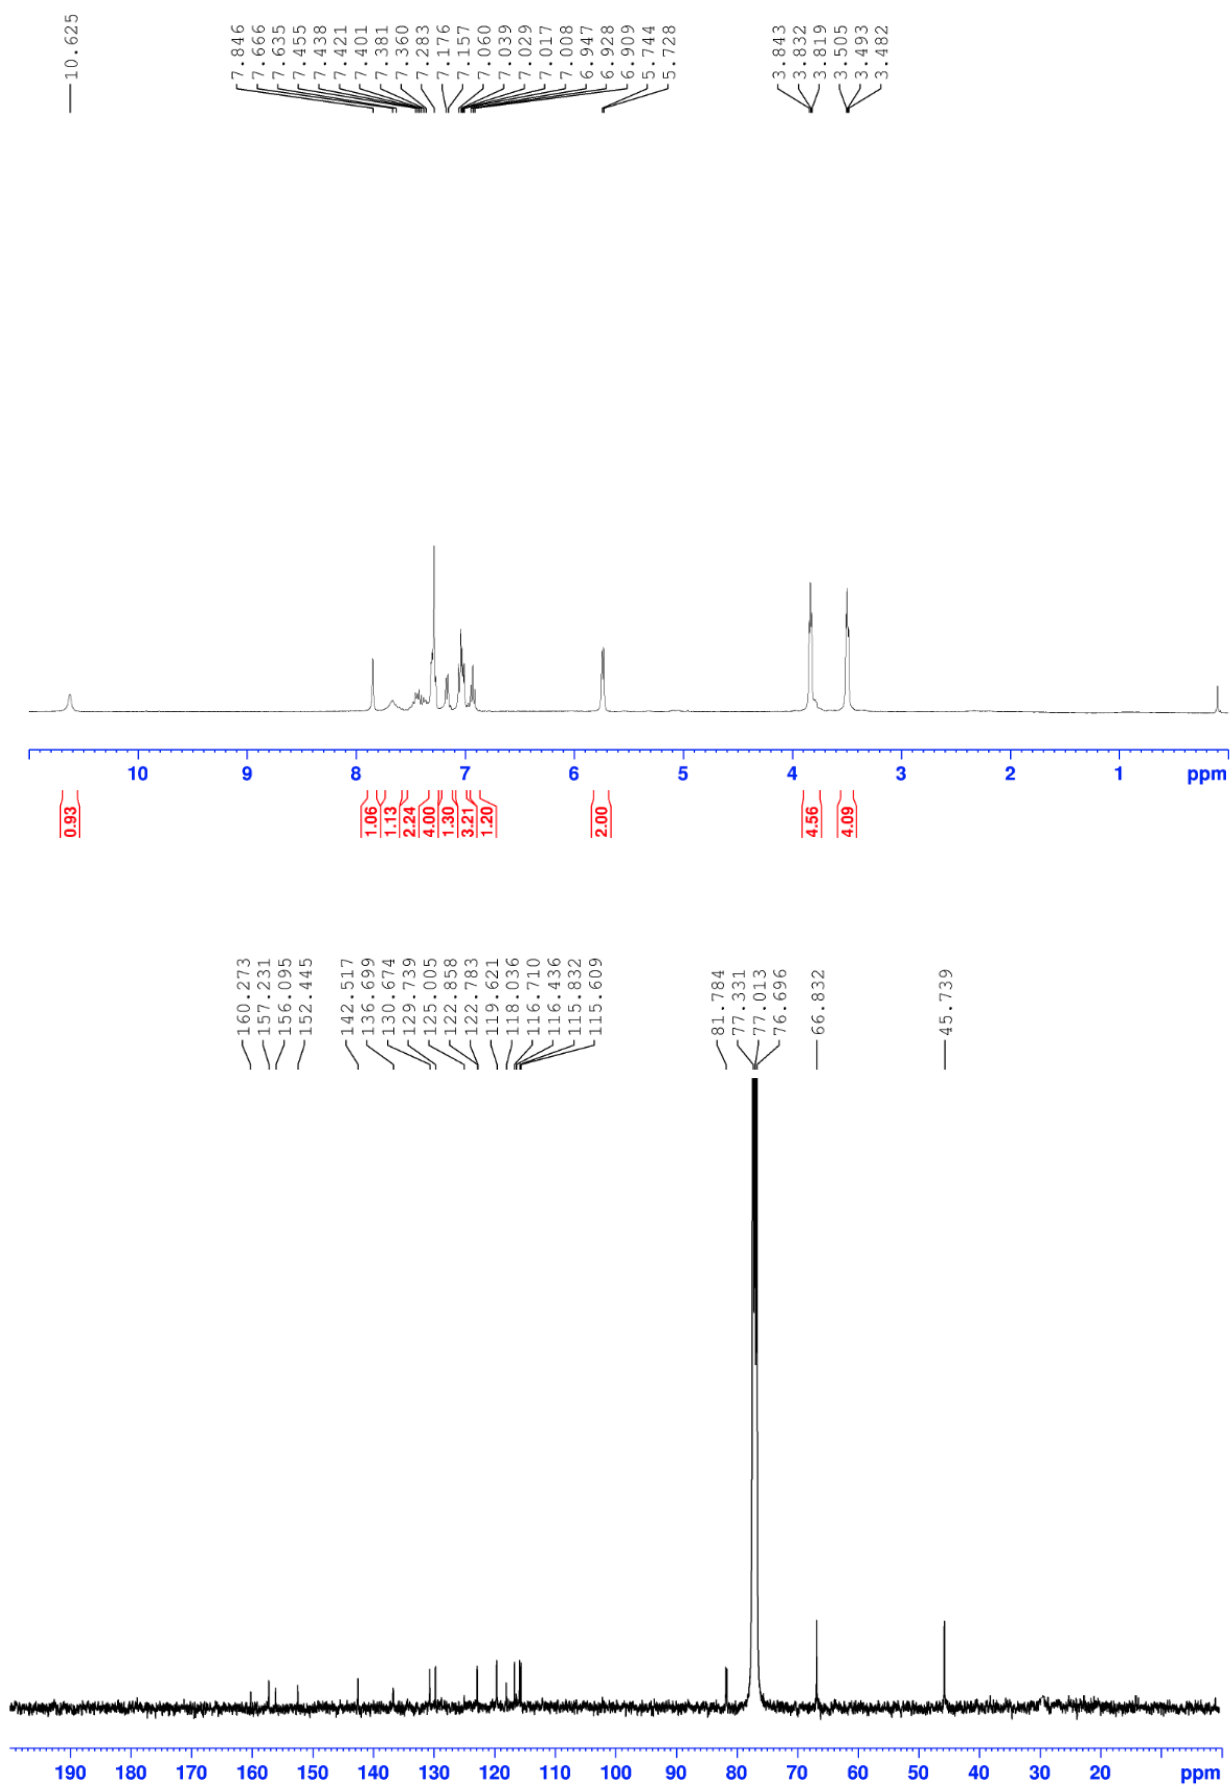



**Pyridine 38b**

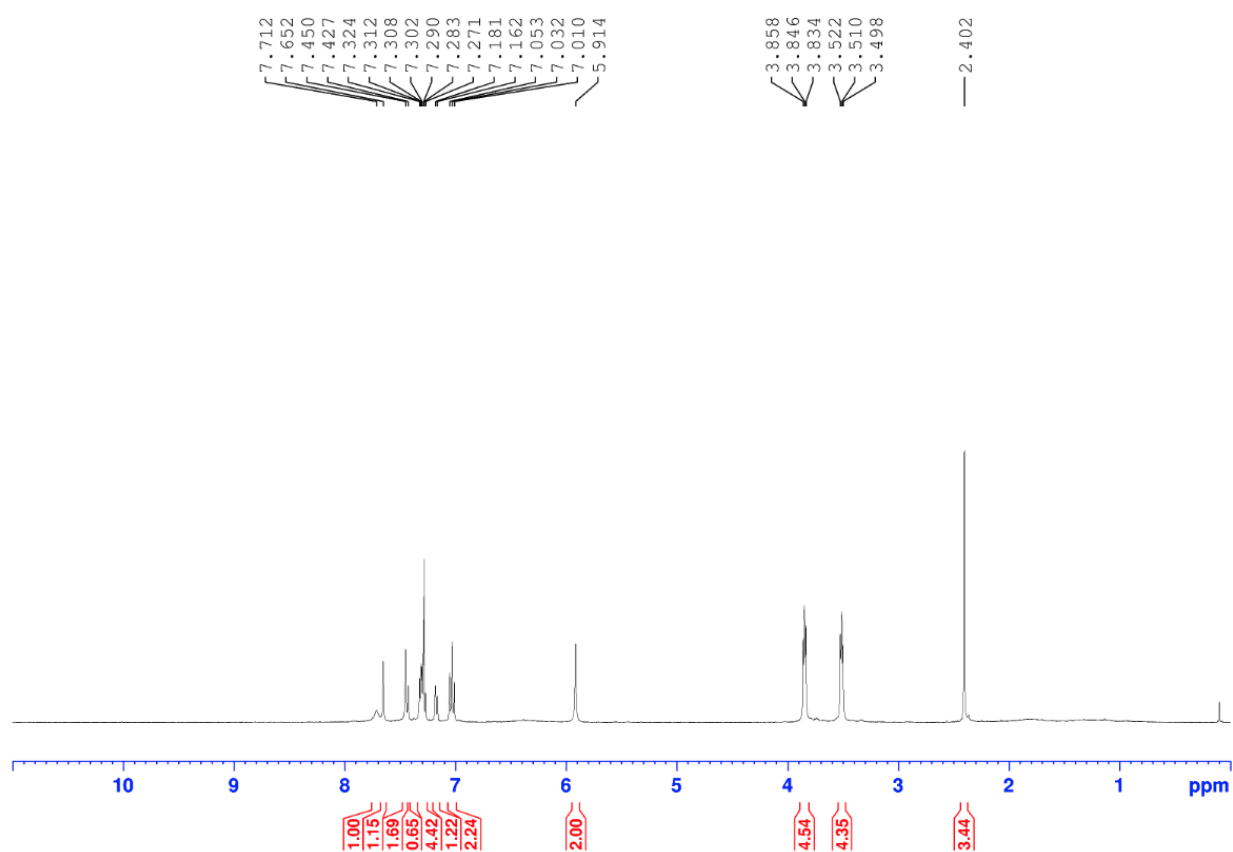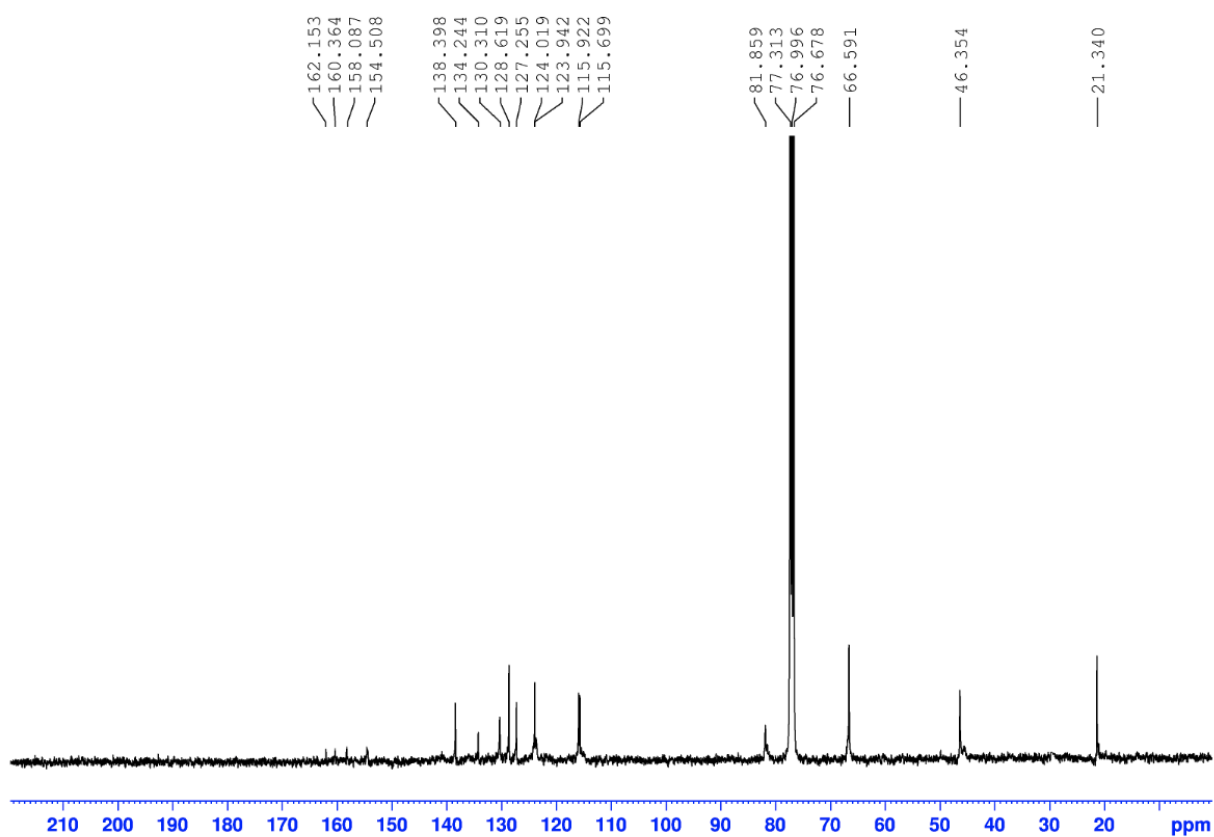

Supplement: s1 [file s1]
